# Supplementary material for: CdS nanoparticles grown in situ on oxygen deficiency-rich WO3−x nanosheets: direct Z-scheme heterojunction towards enhancing visible light-driven hydrogen evolution
Source: Royal Society of Chemistry journal article supplement (doi:10.1039/d0ce00966k), 2020-01-01
Supplement: d0ce00966k1.pdf [file d0ce00966k1.pdf]

**CdS nanoparticles grown in situ on oxygen deficiency-rich  $WO_{3-x}$  nanosheets: direct Z-Scheme heterojunction towards enhancing visible light-driven hydrogen evolution**

Qi Ran,<sup>1, a</sup> Tao zhong,<sup>1, a</sup> Fengyuan Li,<sup>a</sup> Zebin Yu,<sup>\*,a</sup> Yanping Hou,<sup>a</sup> Lun Qian,<sup>a</sup> Jun Huang,<sup>b</sup> Ronghua Jiang,<sup>c</sup> Heqing Zhang,<sup>a</sup> and Qianqian Sun<sup>a</sup>

<sup>a</sup> School of Resources, Environment and Materials, Guangxi University, Nanning 530004, PR China

<sup>b</sup> College of Civil Engineering, Guangxi University, Nanning 530004, PR China

<sup>c</sup> School of Chemical and Environmental Engineering, Shaoguan University, Shaoguan 512005, PR China

<sup>1</sup> Joint first authors

\*Corresponding author: Tel.: + 8613877108420;

E-mail: [xxzx7514@hotmail.com](mailto:xxzx7514@hotmail.com) (Z. Yu)

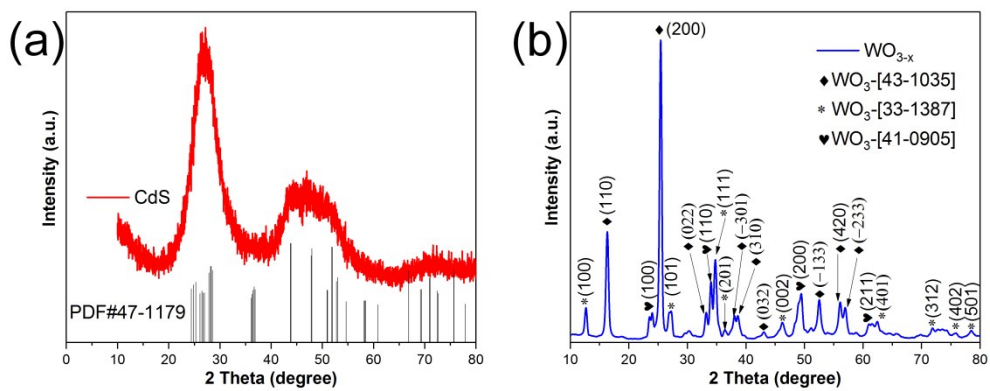

Fig. S1. XRD patterns of (a) CdS and (b)  $WO_{3-x}$ .
